# Supplementary material for: Derivation of human embryonic stem cells in defined conditions
Source: Springer Nature journal article supplement (doi:10.1038/nbt1177), 2006-01-01
Supplement: 41587_2006_BFnbt1177_MOESM2_ESM.pdf [file 41587_2006_BFnbt1177_MOESM2_ESM.pdf]

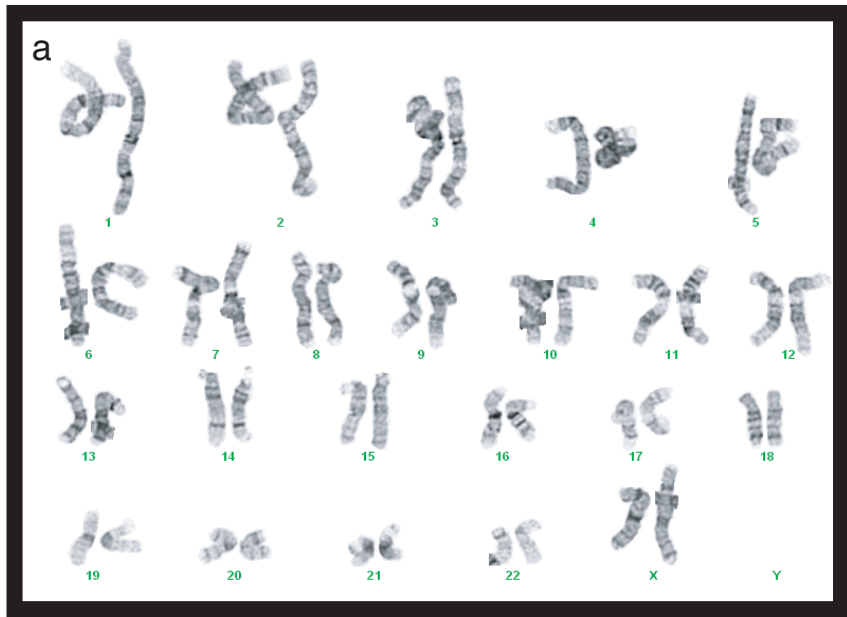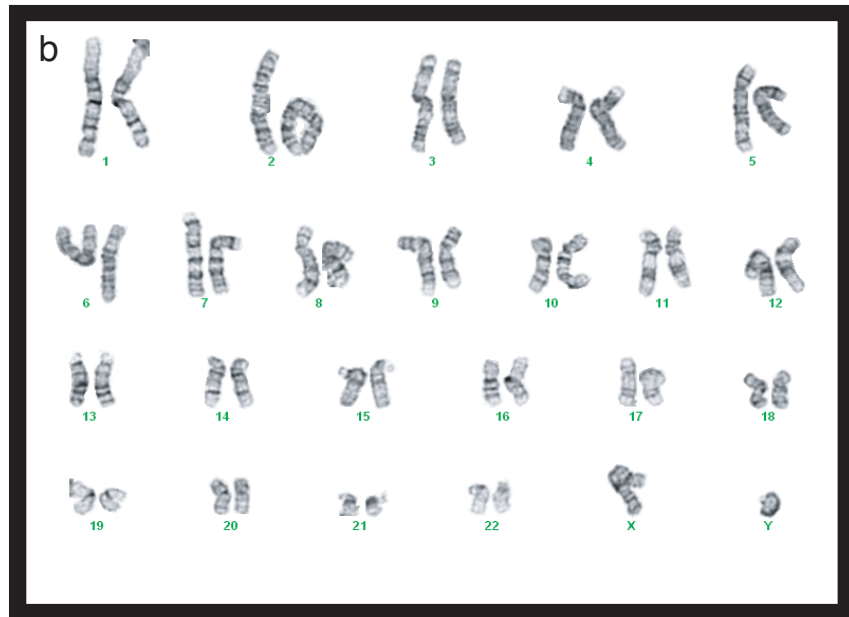

**Supplementary Figure 2.** Karyotype analysis of human ES cells cultured in TeSR1 medium. H9 (a) and H14 (b) cell lines were maintained in TeSR1 medium on Matrigel matrix for 21 and 7 passages respectively and subjected to cytogenetic analysis using G-banding. 20 metaphase cells from each cell line were evaluated. A normal karyotype was observed for all cells examined.
