# Supplementary material for: Derivation of human embryonic stem cells in defined conditions
Source: Springer Nature journal article supplement (doi:10.1038/nbt1177), 2006-01-01
Supplement: 41587_2006_BFnbt1177_MOESM3_ESM.pdf [file 41587_2006_BFnbt1177_MOESM3_ESM.pdf]

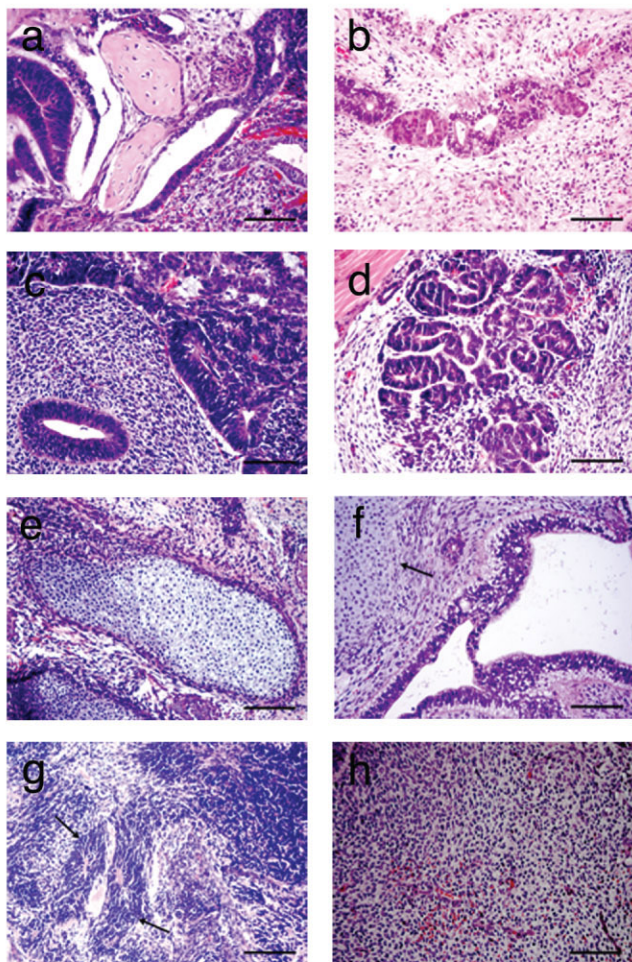

**Supplementary Figure 3.** Pluripotency of human ES cells maintained in TeSR1 medium. H1 and H9 cells cultured in TeSR1 medium on Matrigel for 11 and 20 passages respectively were injected into the rear leg muscle of 4-week-old SCID-beige mice. Teratomas exhibiting complex differentiation developed in the mice 6-8 weeks post-inoculation. (a) Bone, H9 cell line. (b) Epithelial acinar structure, H1 cell line. (c) Epithelial luminal structure, H9 cell line. (d) Epithelial luminal structure, H1 cell line. (e) Cartilage, H9 cell line. (f) Cartilage with epithelial luminal structure, H1 cell line. (g) Rosettes of neural epithelium, H9 cell line. (h) loosely structured mesenchyme, H1 cell line. Scale bar = 100 $\mu$ m.
