# Supplementary material for: Derivation of human embryonic stem cells in defined conditions
Source: Springer Nature journal article supplement (doi:10.1038/nbt1177), 2006-01-01
Supplement: 41587_2006_BFnbt1177_MOESM4_ESM.pdf [file 41587_2006_BFnbt1177_MOESM4_ESM.pdf]

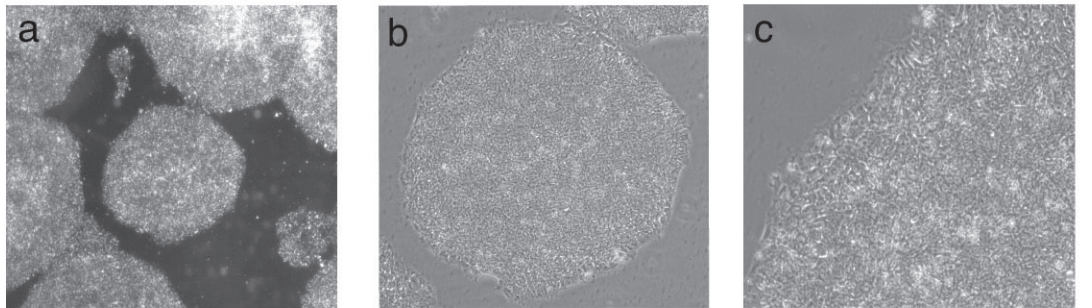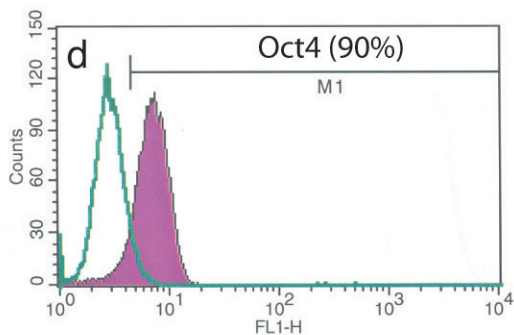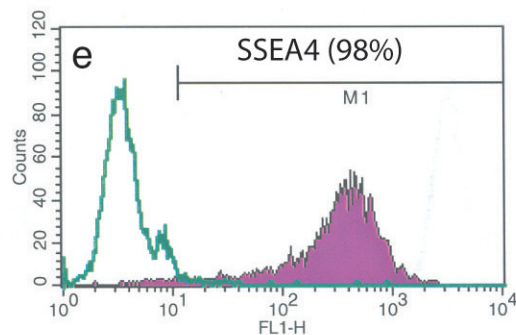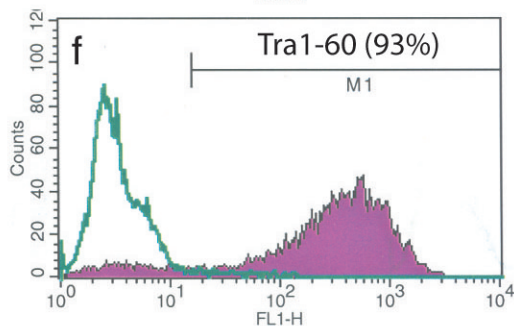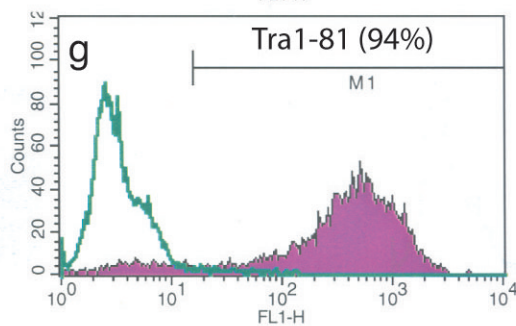

**Supplementary Figure 4.** Representative morphology and FACS analysis of human ES cells cultured in defined, feeder-independent conditions. Human ES cells were cultured for 5 passages in TeSR1 on human matrix and then photographed at magnifications of 2x (a), 4x (b) and 10x (c) using phase contrast microscopy. Cells were analyzed for internal (Oct4) or cell surface (SSEA4, Tra 1-60, Tra 1-81) markers after 11 passages of culture in TeSR1 on human matrix components (d-g). Percent positive cells is listed in parentheses. Data presented is from the H1 cell line. Similar results were obtained using the H9 cell line with 16 passages of culture in TeSR1 on human matrix components.
