# Supplementary material for: Derivation of human embryonic stem cells in defined conditions
Source: Springer Nature journal article supplement (doi:10.1038/nbt1177), 2006-01-01
Supplement: 41587_2006_BFnbt1177_MOESM6_ESM.pdf [file 41587_2006_BFnbt1177_MOESM6_ESM.pdf]

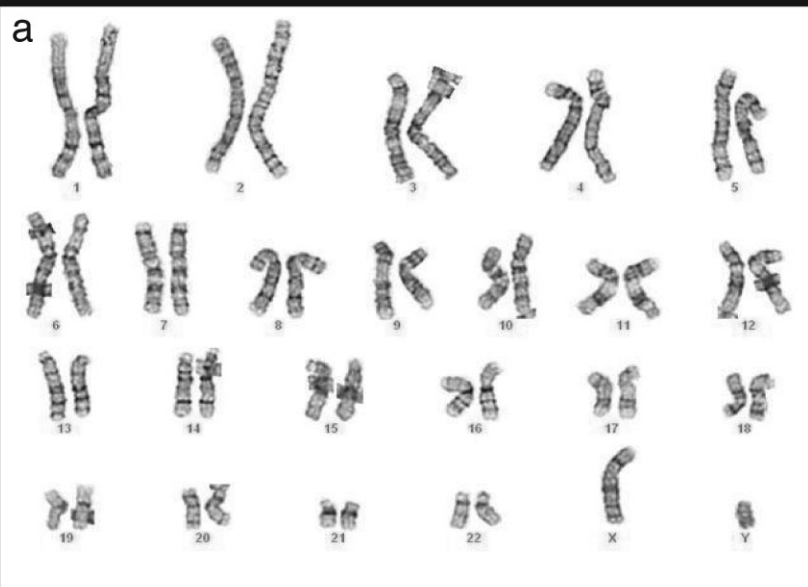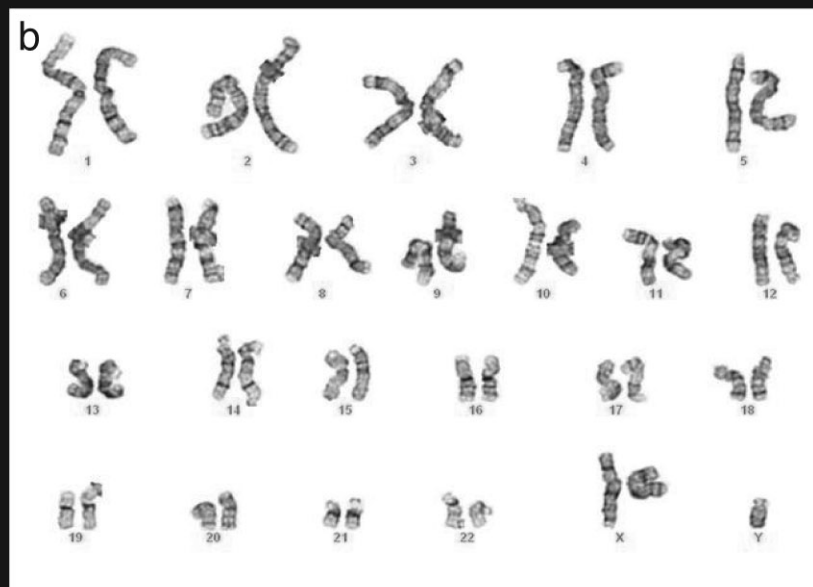

**Supplementary Figure 6.** Karyotype of new human ES cell lines. Human ES cells derived and maintained in TeSR1 on human matrix components for 5 months were subjected to cytogenetic analysis using g-banding. Twenty metaphase cells from each of the cell line were evaluated. **(a)** A normal 46XY karyotype was observed for all WA15 cells, while **(b)** all 20 WA16 cells demonstrated a 47XXY karyotype.
