# Supplementary material for: Derivation of human embryonic stem cells in defined conditions
Source: Springer Nature journal article supplement (doi:10.1038/nbt1177), 2006-01-01
Supplement: 41587_2006_BFnbt1177_MOESM7_ESM.pdf [file 41587_2006_BFnbt1177_MOESM7_ESM.pdf]

**Table S1. Complete Formulation for TeSR1 Medium**

| <b>INORGANIC SALTS</b>                   | <b>mM</b> | <b>AMINO ACIDS</b>             | <b>mM</b> |
|------------------------------------------|-----------|--------------------------------|-----------|
| Calcium chloride (Anhydrous)             | 8.24E-01  | L-Alanine                      | 1.37E-01  |
| HEPES                                    | 1.18E+01  | L-Arginine hydrochloride       | 5.48E-01  |
| Lithium Chloride (LiCl)                  | 9.80E-01  | L-Asparagine-H2O               | 1.37E-01  |
| Magnesium chloride (Anhydrous)           | 2.37E-01  | L-Aspartic acid                | 1.37E-01  |
| Magnesium Sulfate (MgSO4)                | 3.19E-01  | L-Cysteine-HCl-H2O             | 7.83E-02  |
| Potassium chloride (KCl)                 | 3.26E+00  | L-Cystine 2HCl                 | 7.83E-02  |
| Sodium bicarbonate (NaHCO3)              | 1.80E+01  | L-Glutamic acid                | 1.37E-01  |
| Sodium chloride (NaCl)                   | 9.46E+01  | L-Glutamine                    | 2.94E+00  |
| Sodium phosphate, dibas (Anhydrous)      | 3.92E-01  | Glycine                        | 2.94E-01  |
| Sodium phosphate, mono.<br>(NaH2PO4-H2O) | 3.55E-01  | L-Histidine-HCl-H2O            | 1.18E-01  |
|                                          |           | L-Isoleucine                   | 3.26E-01  |
|                                          |           | L-Leucine                      | 3.54E-01  |
|                                          |           | L-Lysine hydrochloride         | 3.91E-01  |
|                                          |           | L-Methionine                   | 9.06E-02  |
|                                          |           | L-Phenylalanine                | 1.69E-01  |
|                                          |           | L-Proline                      | 2.16E-01  |
|                                          |           | L-Serine                       | 2.94E-01  |
|                                          |           | L-Threonine                    | 3.52E-01  |
|                                          |           | L-Tryptophan                   | 3.46E-02  |
|                                          |           | L-Tyrosine 2Na 2H2O            | 1.68E-01  |
|                                          |           | L-Valine                       | 3.55E-01  |
| <b>TRACE MINERALS</b>                    |           | <b>VITAMINS</b>                |           |
| Ferric Nitrate (Fe(NO3)3-9H2O)           | 9.71E-05  | Ascorbic acid                  | 2.53E-01  |
| Ferric sulfate (FeSO4-7H2O)              | 1.18E-03  | Biotin                         | 1.12E-05  |
| Cupric sulfate (CuSO4-5H2O)              | 4.08E-06  | B12                            | 3.94E-04  |
| Zinc sulfate (ZnSO4-7H2O)                | 1.18E-03  | Choline chloride               | 5.03E-02  |
| Ammonium Metavanadate NH4VO3             | 1.09E-05  | D-Calcium pantothenate         | 3.69E-03  |
| Mangenous Sulfate Mn SO4 H2O             | 1.97E-06  | Folic acid                     | 4.71E-03  |
| NiSO4 6H2O                               | 9.70E-07  | i-Inositol                     | 5.49E-02  |
| Selenium                                 | 1.77E-04  | Niacinamide                    | 1.30E-02  |
| Sodium Meta Silicate Na2SiO3 9H2O        | 9.66E-04  | Pyridoxine hydrochloride       | 7.62E-03  |
| SnCl2                                    | 1.24E-06  | Riboflavin                     | 4.56E-04  |
| Molybdic Acid, Ammonium salt             | 1.97E-06  | Thiamine hydrochloride         | 2.42E-02  |
| CdCl2                                    | 1.22E-05  |                                |           |
| CrCl3                                    | 1.98E-06  | <b>GROWTH FACTORS/PROTEINS</b> |           |
| AgNO3                                    | 9.81E-07  | GABA                           | 9.79E-01  |
| AlCl3 6H2O                               | 4.87E-06  | Pipecolic Acid                 | 9.84E-04  |
| Ba (C2H3O2)2                             | 9.79E-06  | bFGF                           | 5.77E-06  |
| CoCl2 6H2O                               | 9.81E-06  | TGF beta 1                     | 2.35E-08  |
| GeO2                                     | 4.97E-06  | Human Insulin                  | 3.92E-03  |
| KBr                                      | 9.89E-07  | Human Holo-Transferrin         | 1.37E-04  |
| KI                                       | 1.00E-06  | Human Serum Albumin            | 1.95E-01  |
| NaF                                      | 9.83E-05  | Glutathione (reduced)          | 6.38E-03  |
| RbCl                                     | 9.81E-06  |                                |           |
| ZrOCl2 8H2O                              | 9.80E-06  | <b>OTHER COMPONENTS</b>        |           |
|                                          |           | Hypoxanthine Na                | 1.18E-02  |
|                                          |           | Phenol red                     | 1.69E-02  |
|                                          |           | Putrescine-2HCl                | 3.95E-04  |
|                                          |           | Thymidine                      | 1.18E-03  |
|                                          |           | 2-mercaptoethanol              | 9.80E-02  |
|                                          |           | Pluronic F-68                  | 2.33E-02  |
|                                          |           | Tween 80                       | 3.29E-04  |
| <b>ENERGY SUBSTRATES</b>                 |           |                                |           |
| D-Glucose                                | 1.37E+01  |                                |           |
| Sodium Pyruvate                          | 3.92E-01  |                                |           |
|                                          |           |                                |           |
| <b>LIPIDS</b>                            |           |                                |           |
| Linoleic Acid                            | 1.88E-04  |                                |           |
| Lipoic Acid                              | 4.00E-04  |                                |           |
| Arachidonic Acid                         | 1.29E-05  |                                |           |
| Cholesterol                              | 1.12E-03  |                                |           |
| DL-alpha tocopherol-acetate              | 2.90E-04  |                                |           |
| Linolenic Acid                           | 6.99E-05  |                                |           |
| Myristic Acid                            | 8.59E-05  |                                |           |
| Oleic Acid                               | 6.94E-05  |                                |           |
| Palmitic Acid                            | 7.65E-05  |                                |           |
| Palmitoleic acid                         | 7.71E-05  |                                |           |
| Stearic Acid                             | 6.89E-05  |                                |           |
